# Supplementary material for: Implementation of innovative medical technologies in German inpatient care: patterns of utilization and evidence development
Source: PubMed Central journal article supplement (PMC8556925; doi:10.1186/s13012-021-01159-3), 2021-10-30

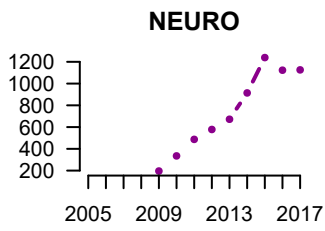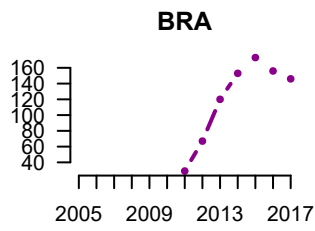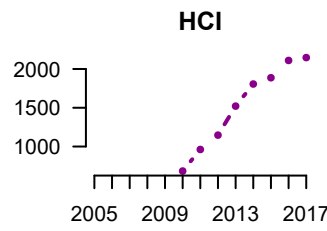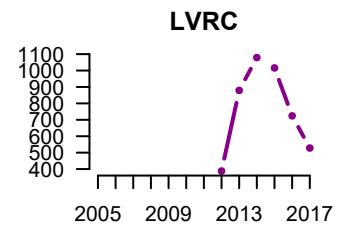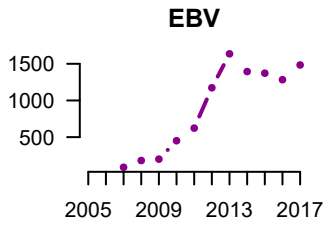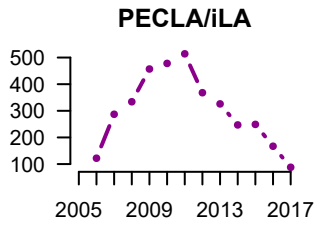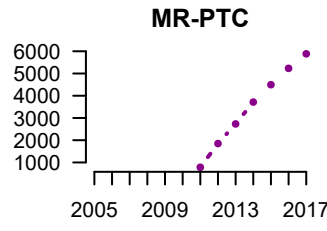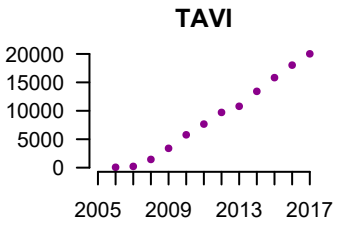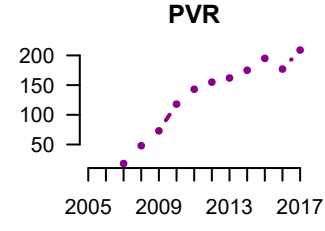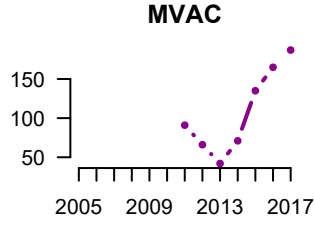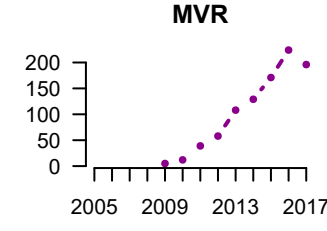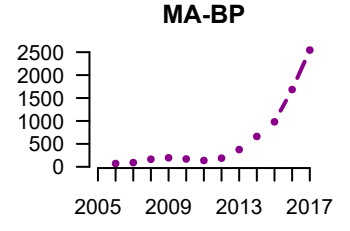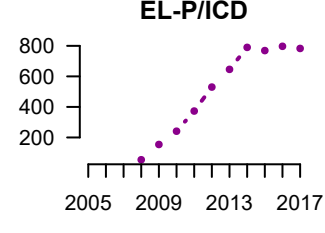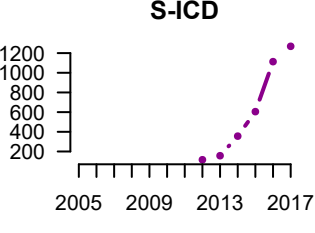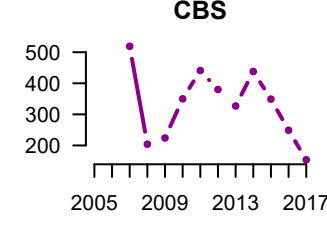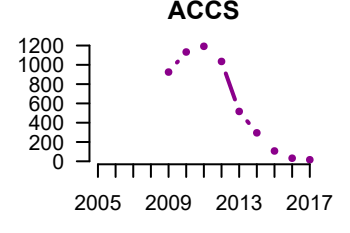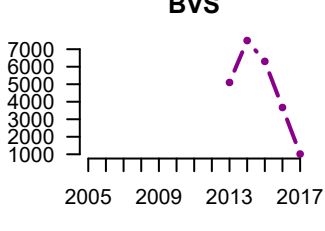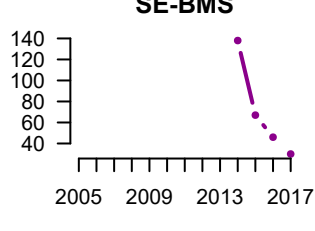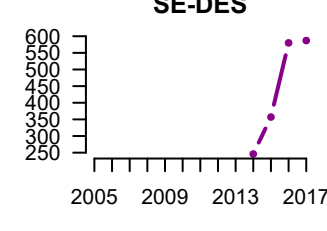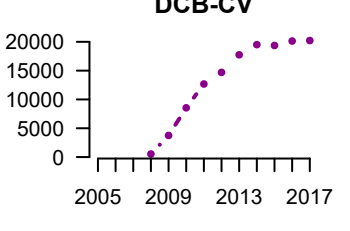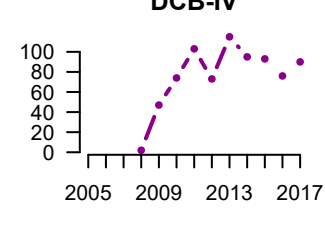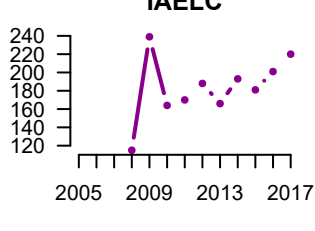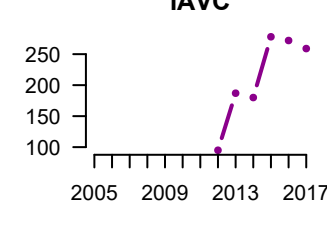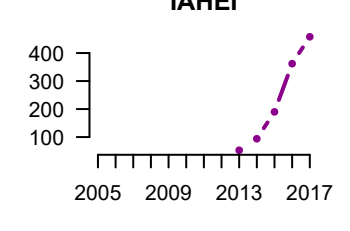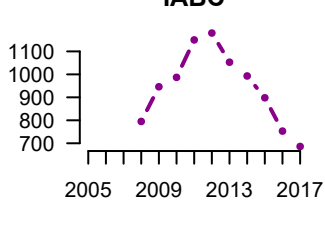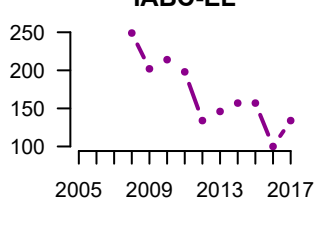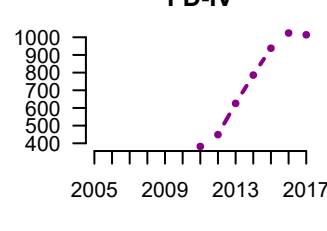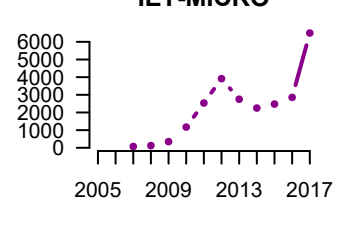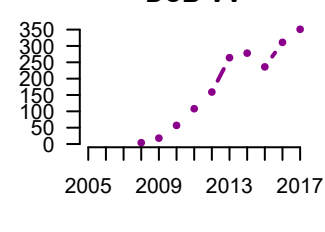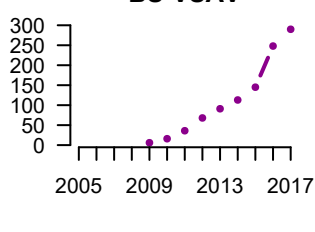

Supplement: 13012_2021_1159_MOESM1_ESM.pdf [file 13012_2021_1159_MOESM1_ESM.pdf]
